# Supplementary material for: Cytoskeletal organization of axons in vertebrates and invertebrates
Source: PubMed Central journal article supplement — J Cell Biol. 2020 May 5;219(7):e201912081. doi: 10.1083/jcb.201912081 (PMC7337489; doi:10.1083/jcb.201912081), 2020-05-05
Supplement: JCB_201912081_TableS1.pdf [file JCB_201912081_TableS1.pdf]

| neuron type                                                   | Ø [µm]  | L [µm]        | AIS properties                                                                                                                                   | Reference                                      |
|---------------------------------------------------------------|---------|---------------|--------------------------------------------------------------------------------------------------------------------------------------------------|------------------------------------------------|
| hippocampal dentate granule cells                             | ~1      | -             | CO, many IS-2-FV, occasional SLP                                                                                                                 | Kosaka, 1983                                   |
| pyramidal & stellate cells, monkey motor cortex               | 0.8-3.3 | 31-54         | CO; IS-2 (2-19); pyramidal cell: occasional SLP; one AIS arising from a dendrite                                                                 | Sloper and Powell, 1979                        |
| pyramidal neurons, mammalian cortex                           | -       | -             | CO; IS-2-FV; frequent SLP                                                                                                                        | Somogyi et al., 1982                           |
| pyramidal neurons, rat hippocampus                            | 0.8-2   | 20-65         | CO, IS-2-FV (25-143), SLP (0-26)                                                                                                                 | Kosaka, 1980a                                  |
| small pyramidal neurons, rat cerebral cortex                  | 0.6-1.2 | -             | CO, IS-RV(?; see Fig. 2C)                                                                                                                        | Peters et al., 1968                            |
| pyramidal neurons, rat pyriform cortex                        | 0.5-3   | -             | CO, IS-2-FV; frequent SLP                                                                                                                        | Westrum, 1970                                  |
| pyramidal neurons, cat somatic sensory cortex                 | -       | -             | C, IS-2-FV                                                                                                                                       | Jones and Powell, 1969                         |
| motor/somatosensory cortex, rhesus monkeys                    | -       | 24-54         | CO, IS-2, SLP                                                                                                                                    | Sloper and Powell, 1973                        |
| various neuron types, rat                                     | -       | -             | Purkinje cell: NS; pyramidal cell: many IS                                                                                                       | Palay et al., 1968                             |
| Purkinje cells, frog                                          | ~1.3    | -             | -                                                                                                                                                | Kohno, 1964                                    |
| Purkinje cells, rat;                                          | 1       | -             | -                                                                                                                                                | Chan-Palay, 1972                               |
| giant cells of Deiters, rat vestibular nucleus                | ~2      | 27            | proximal IS                                                                                                                                      | Sotelo and Palay, 1968                         |
| cartwheel neurons, rat dorsal cochlear nucleus                | 0.6-1.5 | 35            | rare proximal IS                                                                                                                                 | Wouterlood and Mugnaini, 1984                  |
| cat olivary neurons                                           | 0.9-1.3 | 33-40         | 23-36 IS: IS-2-PV (2/3), IS-1-RV (1/3)                                                                                                           | De Zeeuw et al., 1990                          |
| I- & P-cells, monkey lateral geniculate nucleus               | -       | -             | I-cell AISs: may arise from dendrites, with OS-FV in varicosities                                                                                | Hamori et al., 1978                            |
| mitral cells in mouse olfactory bulb                          | -       | -             | timeline of structural AIS development                                                                                                           | Hinds and Ruffett, 1973                        |
| Mitral cells, goldfish olfactory bulb                         | -       | -             | IS-2 (0-3), OS-1 (20-38), RS (14-20)                                                                                                             | Kosaka and Hama, 1979a                         |
| Mitral cells; cat olfactory bulb                              | -       | -             | OS-1, IS-2, RS                                                                                                                                   | Willey, 1973                                   |
| Mitral cells, rat olfactory bulb                              | -       | -             | NS; AIS full of scattered vesicles                                                                                                               | Price and Powell, 1970                         |
| short-axon, periglomerular & tufted cells, rat olfactory bulb | -       | -             | C, IS-2-FV; periglomerular cell: AIS lacks MTF & DUC                                                                                             | Pinching and Powell, 1971                      |
| ruffed cell in goldfish olfactory bulb                        | 0.8-1.5 | 10-20 (Part1) | ~100µm long IP with 10-20 SLP & 30-105 synapses (OS-1-RV; IS-2-PV); Part 1: SLP, DUC, MTF; Part 2: DUC, SLP, no MTF; Part 3: SLP, no DUC, no MTF | Kosaka and Hama, 1979b; Kosaka, 1980b          |
| cat Clarke nucleus neurons/dorsal spino-cerebellar tract      | 1.7-4.2 | 28            | no S                                                                                                                                             | Saito, 1972                                    |
| motoneurons, cat spinal cord                                  | 2.9-4.2 | 23-38         | no S                                                                                                                                             | Conradi, 1969                                  |
| motoneurons, cat spinal cord                                  | 1.3-2.8 | 19-31         | compares AIS of newborn vs. adult; newborn: IS-FV/RV (15-19), SLP; adult: NS, no SLP                                                             | Conradi and Skoglund, 1969                     |
| motoneurons, cat spinal cord                                  | ≥3.3    | 66.7          | on AIS analysed: 3 IS-FV                                                                                                                         | Kojima and Saito, 1970                         |
| motoneurons, cat spinal cord                                  | -       | 40            | IS only on proximal part                                                                                                                         | Poritsky, 1969                                 |
| cat caudate nucleus                                           | -       | -             | AIS can arise from dendrites; CO; SLP, many IS-2-FV/PV                                                                                           | Kemp and Powell, 1971a; Kemp and Powell, 1971b |
| Mauthner cell, goldfish                                       | 10      | 50            | IS-RV?                                                                                                                                           | Nakajima, 1974                                 |
